# Supplementary material for: Spontaneously slow-cycling subpopulations of human cells originate from activation of stress-response pathways
Source: PubMed Central journal article supplement (PMC6433297; doi:10.1371/journal.pbio.3000178), 2019-03-13
Supplement: pbio.3000178.s004.pdf [file pbio.3000178.s004.pdf]

A

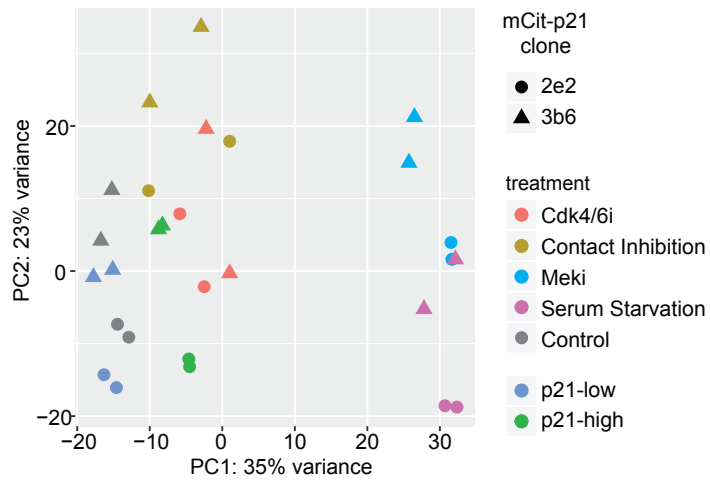

B

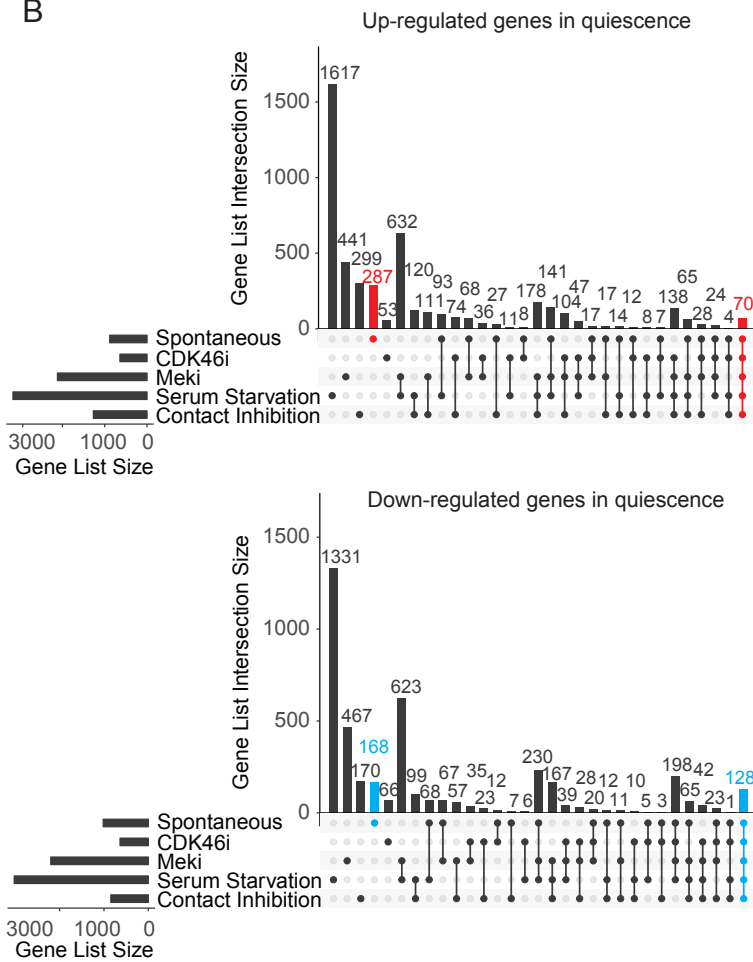

Figure S4
