# Supplementary material for: Spontaneously slow-cycling subpopulations of human cells originate from activation of stress-response pathways
Source: PubMed Central journal article supplement (PMC6433297; doi:10.1371/journal.pbio.3000178), 2019-03-13

A

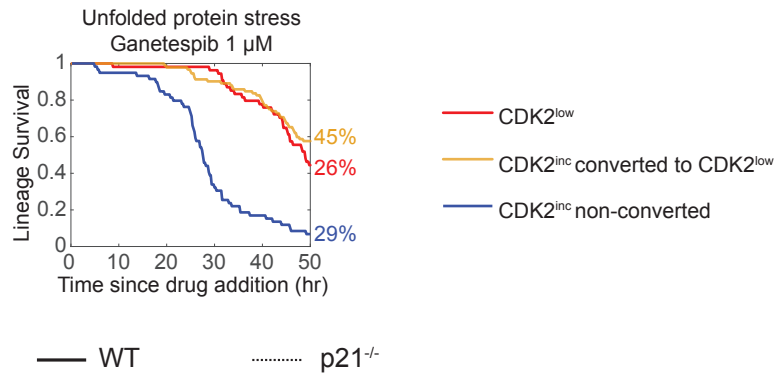

B

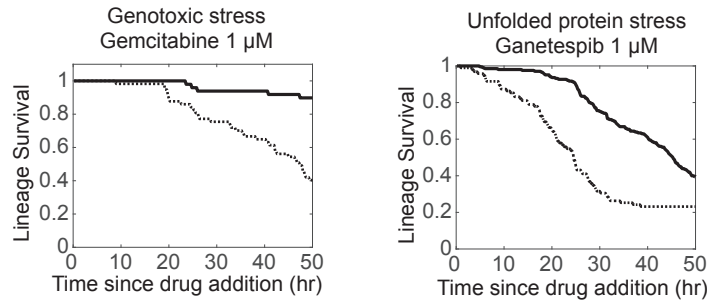

Supplement: pbio.3000178.s007.pdf [file pbio.3000178.s007.pdf]
